# Supplementary material for: First clinical experience with fractionated intracavitary radioimmunotherapy using [177Lu]Lu-6A10-Fab fragments in patients with glioblastoma: a pilot study
Source: Springer Nature journal article supplement (doi:10.1186/s13550-023-01029-7), 2023-09-04
Supplement: MOESM1 [file 26003130]

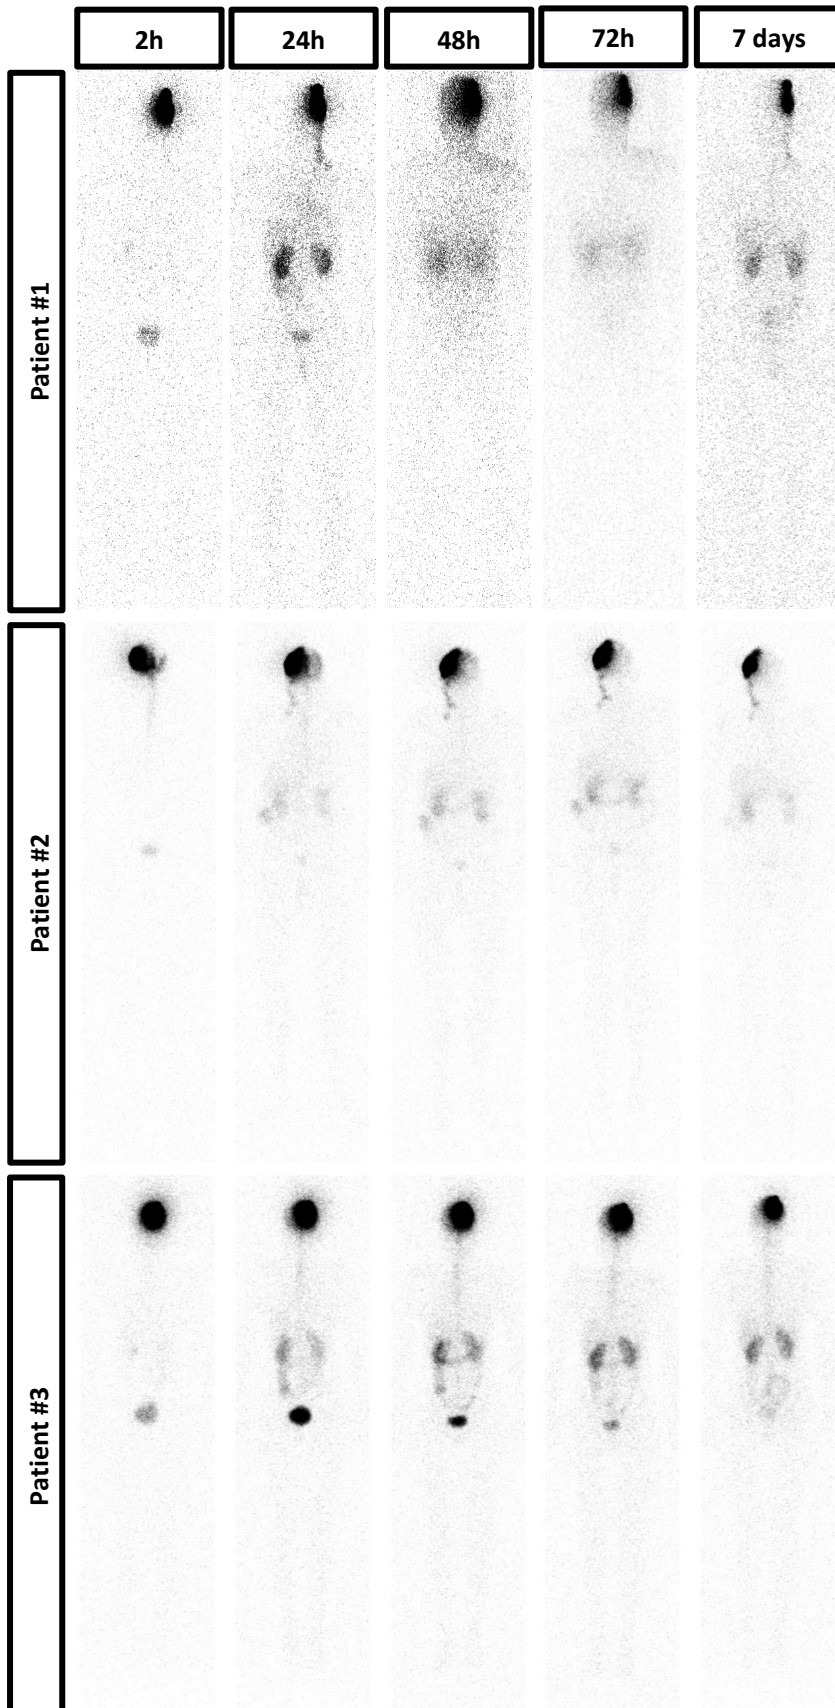

**Supplemental Figure 1:**

Post therapeutic whole body images of all patients from 2h p.i. to 7 days p.i..
